# Supplementary material for: Multiple-bilayered RGO–porphyrin films: from preparation to application in photoelectrochemical cells
Source: Royal Society of Chemistry journal article supplement (doi:10.1039/c2jm33900e), 2012-01-01
Supplement: c2jm33900e.pdf [file c2jm33900e.pdf]

ESI to:

## Multiple-Bilayered RGO/Porphyrin Films: from Preparation to Application in Photoelectrochemical Cells

Jinhua Sun,<sup>a,b</sup> Dongli Meng,<sup>a</sup> Shidong Jiang,<sup>a</sup> Guangfeng Wu,<sup>b</sup> Shouke Yan,<sup>c</sup> Jianxin Geng,<sup>\*a</sup> and Yong Huang<sup>b</sup>

<sup>a</sup> Technical Institute of Physics and Chemistry, Chinese Academy of Sciences, 29 Zhongguancun East Road, Haidian District, Beijing 100190, China. Fax: +86-10-6255 4670; Tel: +86-10-8254 3416; E-mail: jianxingeng@mail.ipc.ac.cn

<sup>b</sup> Institute of Chemical Engineering, Changchun University of Technology, 2055 Yan'an Street, Changchun 130012, China

<sup>c</sup> State Key Laboratory of Chemical Resource Engineering, Beijing University of Chemical Technology, 15 Beisanhuan East Road, Chaoyang District, Beijing 100029, China

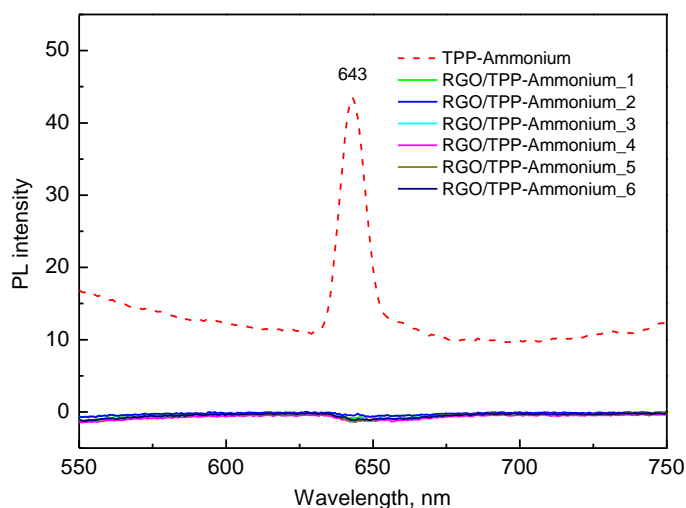

Figure S1. PL spectra of the multiple-bilayered RGO/TPP-ammonium films.

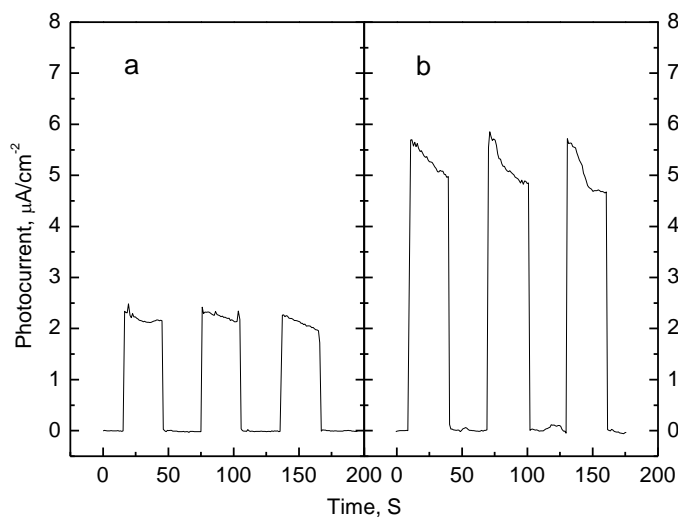

Figure S2. Typical photocurrent curves of (a) a one-bilayered RGO/TPP-ammonium film and (b) a six-bilayered RGO/TPP-ammonium film.
